# Supplementary material
Source: Springer Nature journal article supplement (https://www.springermedizin.de/resource/supplementary/12981_2012_266_MOESM3_ESM.pdf/9603534)

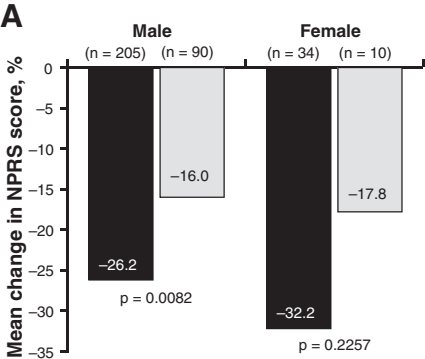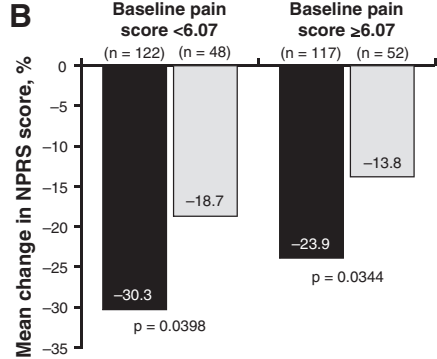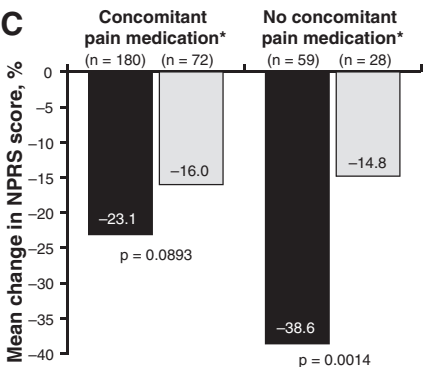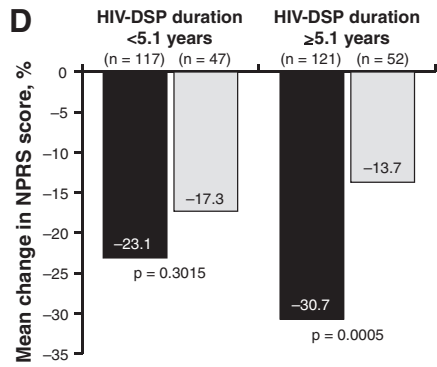

■ NGX-4010

■ Control

Supplement: MOESM3 [file 9603534]
